# Supplementary material for: Pseudomolecule-level assembly of the Chinese oil tree yellowhorn (Xanthoceras sorbifolium) genome
Source: PubMed Central journal article supplement (PMC6593361; doi:10.1093/gigascience/giz070), 2019-06-26
Supplement: giz070_response_to_reviewer_comments_revision_1.pdf [file giz070_response_to_reviewer_comments_revision_1.pdf]

## Author's Response To Reviewer Comments

Close

See the personal cover letter in the last section of the GIGA-D-18-00337\_R2

Close
